# Supplementary material
Source: PubMed Central journal article supplement (PMC3716465)
Supplement: NIHMS309011-supplement-Map1a.pdf [file NIHMS309011-supplement-Map1a.pdf]

## Water Test Results for Rhynium: Springdale Township

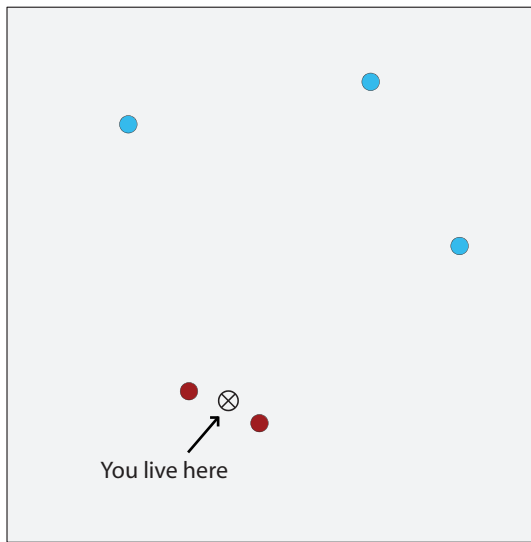

### Parts per Billion (ppb) Rhynium

- Greater than 20
- 10\* - 20
- 6 - 9
- 2 - 5
- Less than 2

\*Maximum Contaminant Level (MCL) = 10 ppb

The MCL is a health standard for drinking water set by the Environmental Protection Agency.

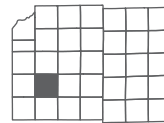

Dane County

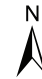

0 1 2 Miles
