# Supplementary material
Source: PubMed Central journal article supplement (PMC3716465)
Supplement: NIHMS309011-supplement-Table.pdf [file NIHMS309011-supplement-Table.pdf]

Paper: The influence of mapped hazards on risk beliefs: A proximity-based modeling approach

Online Table. Standardized Beta Coefficients ( $\beta$ )<sup>1</sup> and Adjusted  $R^2$  for Susceptibility Belief for Map Pairs Stratified by Manipulated Hazard Amount

| Attributes                    | Distance   |            |                         |                         |            |            |            |            |            |            | Cluster Location        |                         |                         |                         | Prevalence |            |        |
|-------------------------------|------------|------------|-------------------------|-------------------------|------------|------------|------------|------------|------------|------------|-------------------------|-------------------------|-------------------------|-------------------------|------------|------------|--------|
|                               | 2.d<br>4.b | 2.c<br>4.a | 2.d <sup>1</sup><br>4.d | 2.c <sup>1</sup><br>4.c | 2.b<br>4.d | 4.a<br>4.c | 1.a<br>6.d | 1.b<br>6.c | 2.b<br>3.c | 2.a<br>3.d | 3.a <sup>1</sup><br>5.a | 3.b <sup>1</sup><br>5.b | 3.a <sup>3</sup><br>5.a | 3.b <sup>3</sup><br>5.b | 3.c<br>6.b | 3.d<br>6.a |        |
| Distance <sup>2</sup>         | C-F        | C-F        | M-F                     | M-F                     | C-M        | C-M        | C-M        | C-M        | M-F        | M-F        | M                       | M                       | M                       | M                       | M          | M          |        |
| Prevalence                    | 1          | 1          | 1                       | 1                       | 1          | 1          | 2          | 2          | 8          | 8          | 8                       | 8                       | 8                       | 8                       | 2/8        | 2/8        |        |
| Cluster Location <sup>3</sup> | -          | -          | -                       | -                       | -          | -          | -          | -          | O          | O          | I-O                     | I-O                     | I-O                     | I-O                     | O          | O          |        |
| Angle <sup>4</sup>            |            |            |                         |                         |            |            | W          | W          | -          | -          | -                       | -                       | -                       | -                       | N          | N          |        |
| Density <sup>5</sup>          | -          | -          | -                       | -                       | -          | -          | -          | -          | T          | T          | T                       | T                       | L                       | L                       | T          | T          |        |
| Hazard value                  | Large      | Small      | Large                   | Small                   | Large      | Small      | Large      | Mix        | Large      | Mix        | Large                   | Mix                     | Large                   | Mix                     | Large      | Mix        |        |
| Attribute <sup>6</sup>        | $\beta$    | .84***     | -.15*                   | .61***                  | .01        | .48***     | -.15*      | .41***     | .18**      | .73***     | .58***                  | .90***                  | .75***                  | .73***                  | .48***     | .19**      | .37*** |
|                               | $R^2$      | .69        | .03                     | .38                     | .01        | .24        | .03        | .17        | .10        | .56        | .38                     | .82                     | .62                     | .53                     | .23        | .08        | .08    |

Results for high and low/mixed hazard amount pairs are designated by alternate shading

1. Path analysis conducted within map block (same participants viewed both maps)

2. C = close, M = medium, F = far

3. O = out, I = in;

4. N = narrow, W = wide;

5. Loose, T = Tight

6. For attribute listed in the column header

\* $p < .10$ , \*\* $p < .05$ , \*\*\* $p < .01$ , \*\*\*\* $p < .001$
